# Supplementary material for: Transcriptomic Analysis of the Mechanisms for Alleviating Psoriatic Dermatitis Using Taodan Granules in an Imiquimod-Induced Psoriasis-like Mouse Model
Source: Frontiers journal article supplement (doi:10.3389/fphar.2021.632414), 2021-04-14
Supplement: Table_2.DOCX [file Table_2.DOCX]

**Table S2** **Primer sequences for RT-PCR**

| GENE NAME | F | R |
| --- | --- | --- |
| Wfdc21 | GCTCAGTGGGTGAAGAGGTT | GCTCAGCACAGGTGCCTAAA |
| Gprin2 | GTGACAGCTTCCCCTTCTGG | AACTCATGGCTGCCCTGTC |
| Sema3d | TGCTAGCAGGAAGGGTGAAC | ACAGGAAGAAAGAGCACCGT |
| Igfbp2 | AGGTGACACTGCAGACCTCG | TCGTCATCACTGTCTCCCAAC |
| Krt77 | GGGGCATCCATGAGGTGACT | CAGGAACCGCACCTTGTCA |
| Skint10 | GCACACAGCAACTTTGGCTTA | CTGAAGACTCCATCACACCAAA |
| Gjb5 | ATGCTTGCTGAACCCCAACT | GGGCTGGCTGCTCCTGA |
| Bhlhe41 | GCGAGACGATACCAAGGATACC | TCGGCTTTTCCTGGGCATTC |
| Hspa12a | TTGTGGGTACCTGAACGACTG | CCTCCTTCCCATCTCCGCAT |
| Lce1m | CTCCAGTGCCTGAGTTCCTT | GGCACTTTGGGGTCTTGCAT |
| Itgam | CTTCTGGTCACAGCCCTAGC | GGGGGACAGTAGAAACAGCC |
| Cdhr1 | AGCATTTCCGATGGCCTGAA | CCCAGCAGGTATGTTCTCTGG |
| Itgb2 | CTGGTGCCAGAAGCTGAACT | TGCTCCTGGGGTCCATGATA |
| Rac2 | AGCCTGCTCTAGGGGTGTCA | CAGCACGTCACTGAGCTTTG |
| Siglece | ATGGGGACCTTTGTGGGTTC | CTGTAGGATCTTACTGCCAGGAG |
| Cd300e | GAGGACCTCAGCGAAGACAA | TGTAGGAGTTGTGGCTGGAAAA |
| Ms4a6c | AGACAGGAGTGAATGTGCCG | AGAGCCTCGGTTCCTAAGGG |
| Sprr2a3 | CTCCGGAGAACCTGATTCTGA | ACAGGAGGGCATGTTGACTG |
| Pik3ap1 | GGACTCTGCTTCTAACCCCG | CCGGCCCCACCCTGA |
| Hcls1 | AAGCCGTAACCAGGAACCAG | CCTCAGCTGGTGGATGTTGAT |
